# Supplementary material
Source: Springer Nature journal article supplement (https://www.springermedizin.de/resource/supplementary/12911_2005_84_MOESM8_ESM.pdf/9527092)

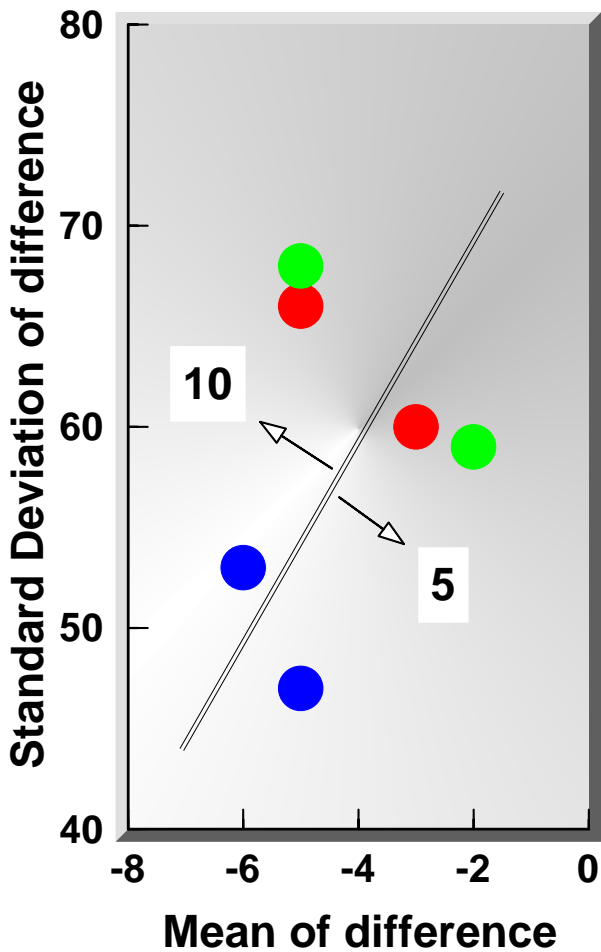

- otc only ●
- otc+ov ●
- ov only ●

Supplement: MOESM8 [file 9527092]
